# Supplementary material for: Vapor triggered fluorescent color changes among solvates of Emodin
Source: Royal Society of Chemistry journal article supplement (doi:10.1039/c7tc01593c), 2017-01-01
Supplement: c7tc01593c1.pdf [file c7tc01593c1.pdf]

## Vapor Triggered fluorescent color changes among solvates of Emodin

Meiqi Li, Qi Zhang, Hongyan He, Jian-Rong Wang and Xuefeng Mei\*

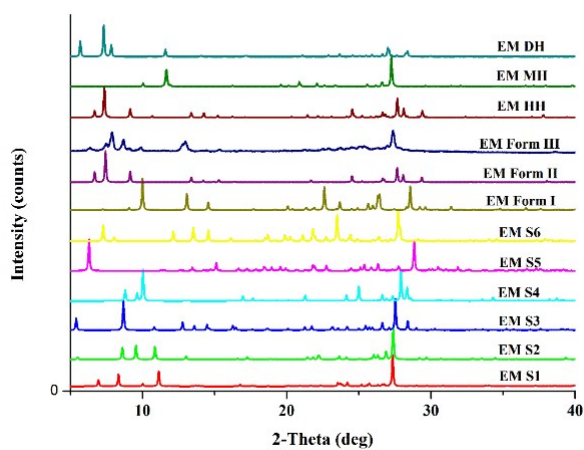

Figure S1. XRPD comparison of EM solvates, hydrates and polymorphs.

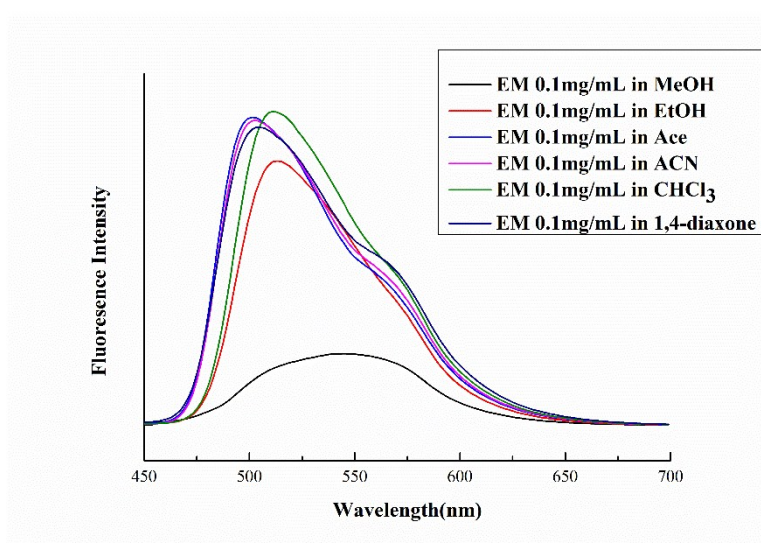

Figure S2. Fluorescent spectra of EM in different solvent with a concentration of 0.1 mg/mL.

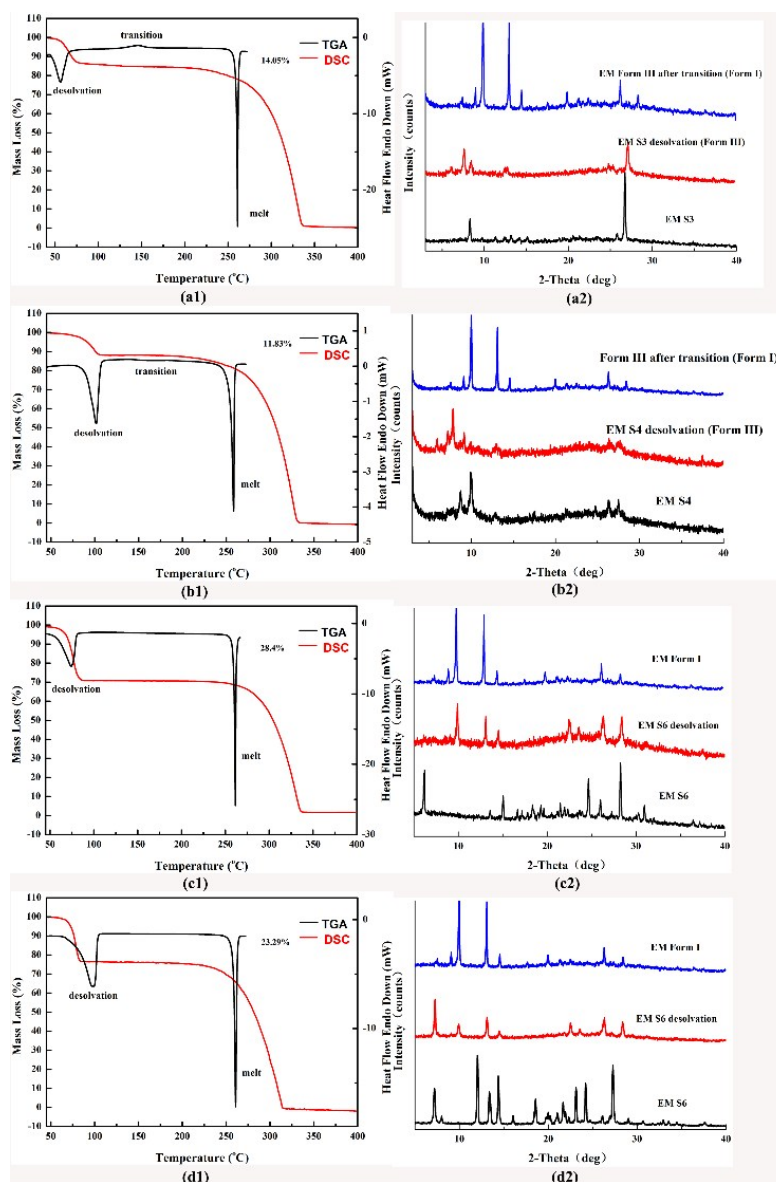

**Figure S3.** TGA, DSC diagrams and desolvation XRPD patterns of EM solvates. (a1) TGA & DSC diagram of S3, (a2) desolvation XRPD of S3, (b1) TGA & DSC diagram of S4, (b2) desolvation XRPD of S4, (c1) TGA & DSC diagram of S5, (c2) desolvation XRPD of S5, (d1) TGA & DSC diagram of S6, (d2) desolvation XRPD of S6.

**Table S1.** Thermal data (TGA and DSC) for EM solvates

| Guest molecule                                 | Methanol | Ethanol | Acetone  | Acetonitrile | Chloroform | 1,4-dioxane |
|------------------------------------------------|----------|---------|----------|--------------|------------|-------------|
|                                                | (S1)     | (S2)    | (S3)     | (S4)         | (S5)       | (S6)        |
| Properties                                     | Channel  | Channel | Isolated | Channel      | Channel    | Channel     |
| Calcd weight loss (%)                          | 10.6     | 14.6    | 17.7     | 13.2         | 30.6       | 24.58       |
| Obsd weight loss in TGA (%)                    | 8.2      | 13.5    | 14.1     | 11.8         | 28.4       | 23.3        |
| Guest loss Ton in DSC (oC)                     | 79.8     | 69.5    | 46.9     | 90.5         | 58.63      | 81.2        |
| Solvent boiling point (oC)                     | 64.7     | 78.3    | 56.5     | 81.5         | 61.3       | 88.1        |
| $\Delta H$ for guest loss (J g <sup>-1</sup> ) | 145.5    | 127.2   | 69.8     | 100.1        | 100.3      | 151.9       |

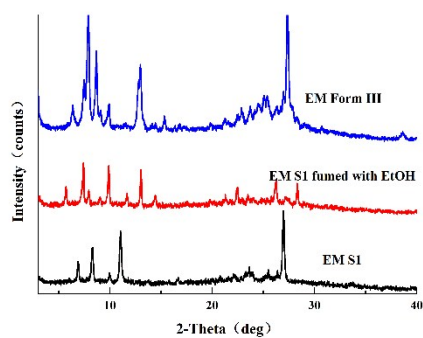

(a)

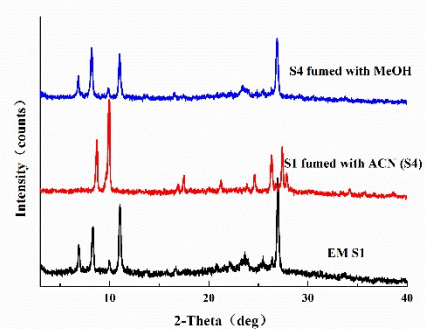

(b)

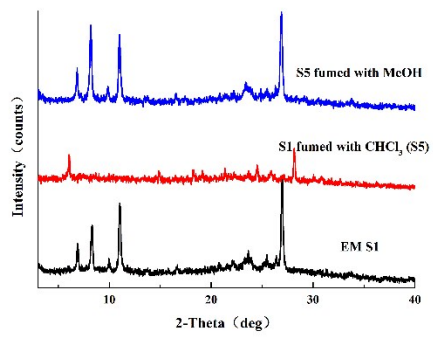

(c)

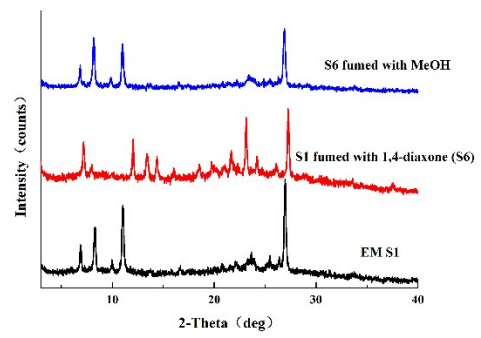

(d)

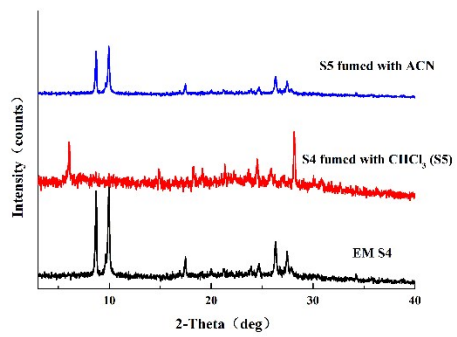

(e)

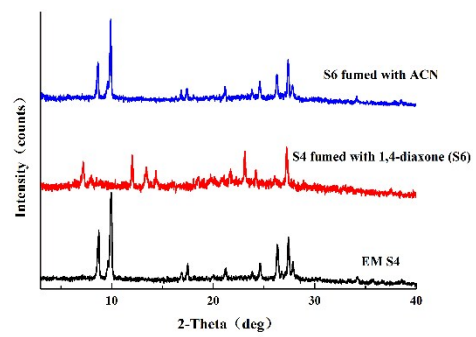

(f)

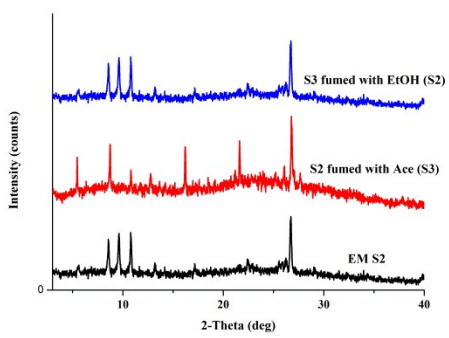

(g)

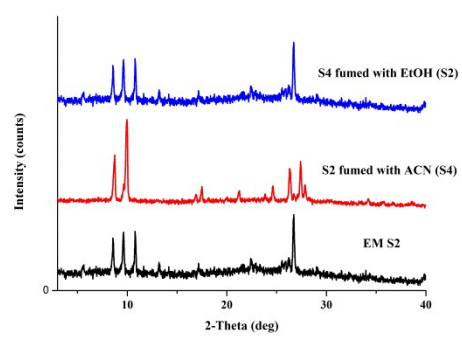

(h)

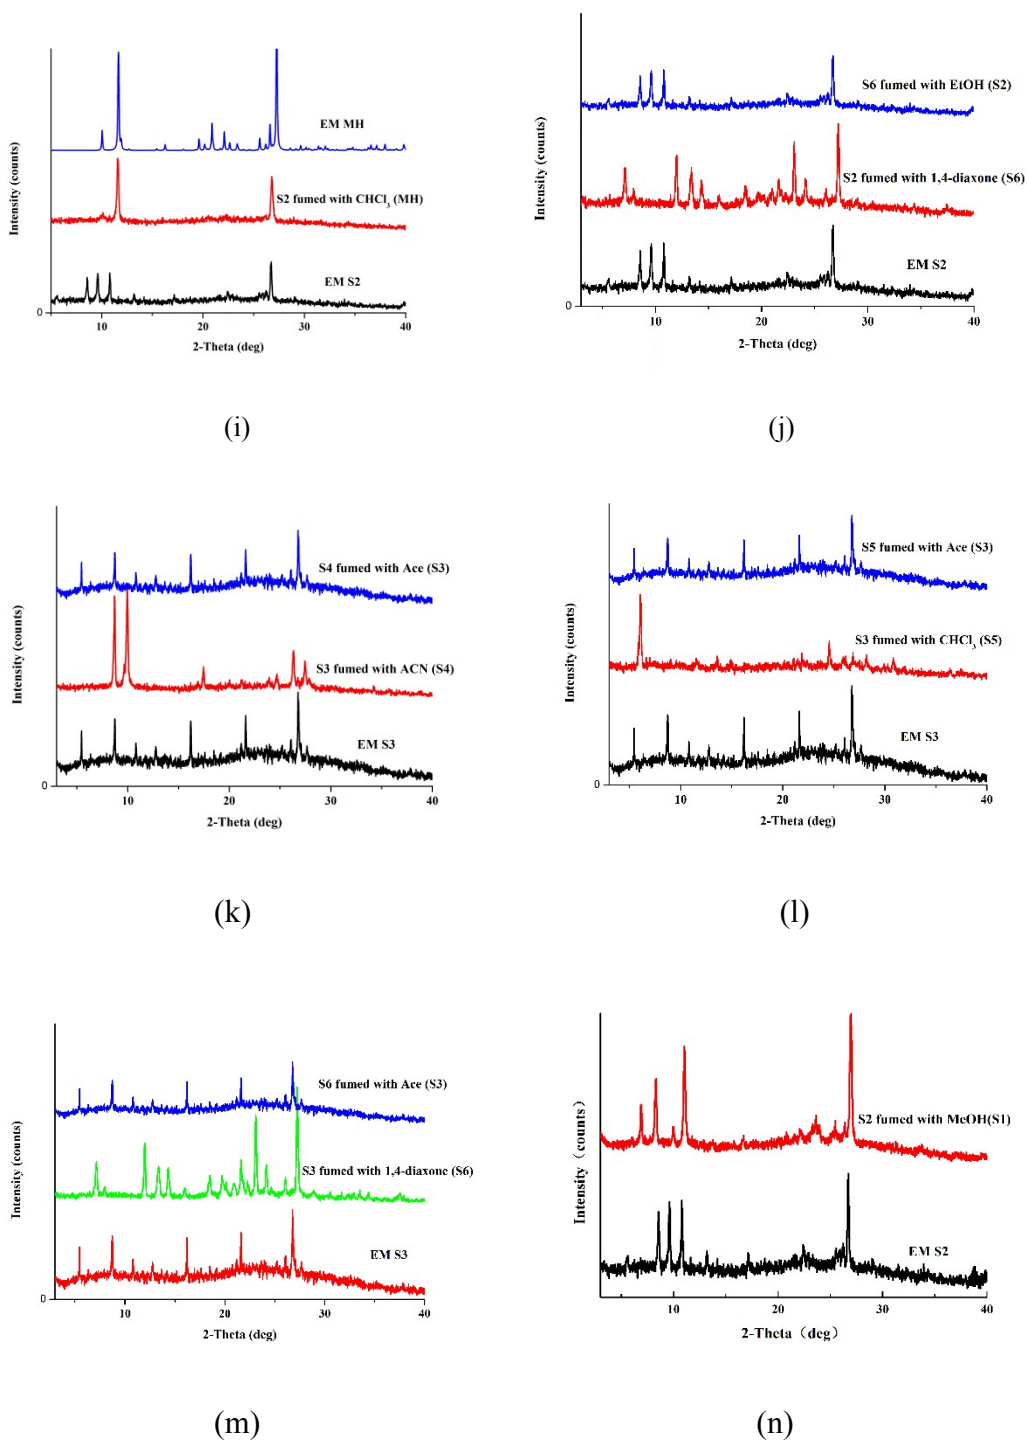

**Figure S4.** XRPD patterns of each combination. (a) S1-S2, (b) S1-S4, (c) S1-S5, (d) S1-S6, (e) S4-S5, (f) S4-S6, (g) S2-S3, (h) S2-S4, (i) S2-MH, (j) S2-S6, (k) S3-S4, (l) S3-S5, (m) S3-S6, (n) S2-S1

**Table S2.** Organic vapor mediated transition combinations of EM solvates.

| organic vapor | Methanol(MeOH) | Ethanol(EtOH)        | Acetone(Ace)   | Acetonitrile(ACN) | Chloroform(CHCl <sub>3</sub> ) | 1,4-dioxane    |
|---------------|----------------|----------------------|----------------|-------------------|--------------------------------|----------------|
| S1            |                | Form III(Figure.S3a) | Not conducted  | S4(Figure.S3b)    | S5(Figure.S3c)                 | S6(Figure.S3d) |
| S2            | S1(Figure.S3n) |                      | S3(Figure.S3g) | S4(Figure.S3h)    | MH(Figure.S3i)                 | S6(Figure.S3j) |
| S3            | Not conducted  | S2(Figure.S3g)       |                | S4(Figure.S3k)    | S5(Figure.S3l)                 | S6(Figure.S3m) |
| S4            | S1(Figure.S3b) | S2(Figure.S3h)       | S3(Figure.S3k) |                   | S5(Figure.S3e)                 | S6(Figure.S3f) |
| S5            | S1(Figure.S3c) | S2(Figure.S3i)       | S3(Figure.S3l) | S4(Figure.S3e)    |                                | Not conducted  |
| S6            | S1(Figure.S3d) | S2(Figure.S3j)       | S3(Figure.S3m) | S4(Figure.S3f)    | Not conducted                  |                |

“not conducted”: S1-S3 and S5-S6 presents almost the same fluorescent color, thus the fluorescent color and relative solid-state transitions of S1-S3 and S5-S6 were not conducted.

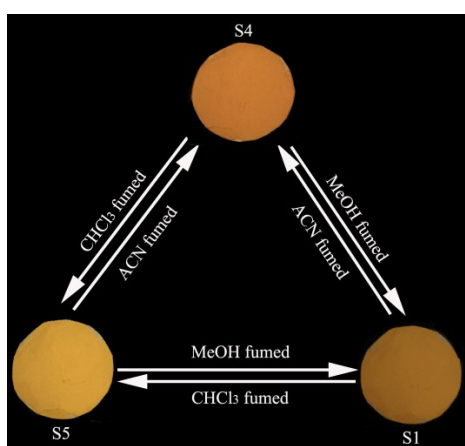

**Figure S5.** Vapochromic phenomena under 365 nm UV irradiation and reversible transition relationships among EM solvates (S1, S4 and S5).

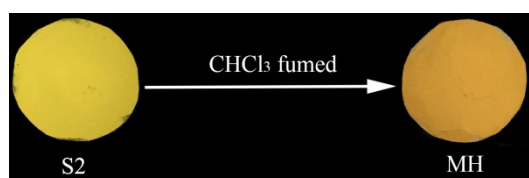

**Figure S6.** Vapochromic phenomena of S2 filter paper under 365 nm UV irradiation.

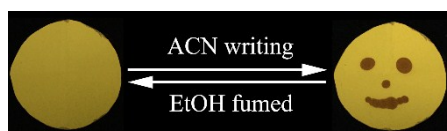

(a)

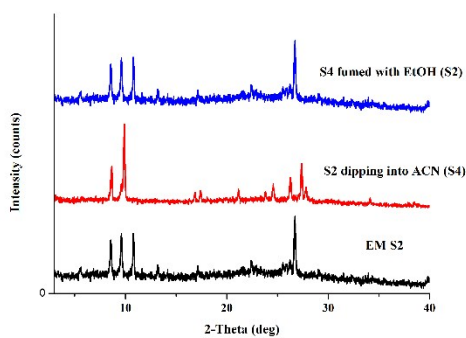

(b)

**Figure S7.** (a) Photographs of EM cast filter paper revealed a writing-erasing process under 365 nm UV irradiation. (b) XRPD patterns of EM S2 after dipping into acetonitrile solvent and subsequently exposing to ethanol vapor.

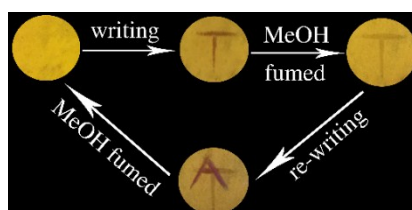

(a)

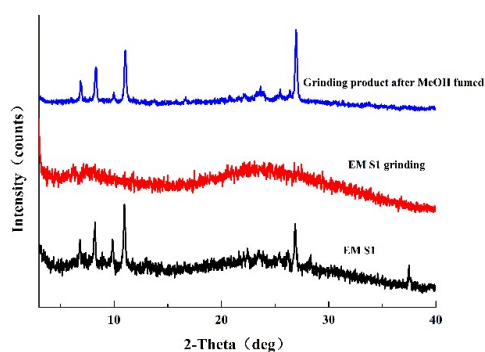

(b)

**Figure S8.** (a) Photographs of reversible fluorescent color changes in the writing paper made by S1. (b) XRPD patterns of S1 powder under mechanical milling and vapor treatment.

**Table S3.** Unit Cell Comparison for the solvates of EM

|                                     | S1                                                                  | S2                                                                                | S3                                                                                | S4                                                                                | S5                                                                  | S6                                                                                             |
|-------------------------------------|---------------------------------------------------------------------|-----------------------------------------------------------------------------------|-----------------------------------------------------------------------------------|-----------------------------------------------------------------------------------|---------------------------------------------------------------------|------------------------------------------------------------------------------------------------|
| Formula                             | C <sub>15</sub> H <sub>10</sub> O <sub>5</sub><br>CH <sub>4</sub> O | C <sub>15</sub> H <sub>10</sub> O <sub>5</sub><br>C <sub>2</sub> H <sub>6</sub> O | C <sub>15</sub> H <sub>10</sub> O <sub>5</sub><br>C <sub>3</sub> H <sub>6</sub> O | C <sub>15</sub> H <sub>10</sub> O <sub>5</sub><br>C <sub>2</sub> H <sub>3</sub> N | C <sub>15</sub> H <sub>10</sub> O <sub>5</sub><br>CHCl <sub>3</sub> | C <sub>15</sub> H <sub>10</sub> O <sub>5</sub><br>C <sub>4</sub> H <sub>8</sub> O <sub>2</sub> |
| Crystal system                      | monoclinic                                                          | triclinic                                                                         | monoclinic                                                                        | monoclinic                                                                        | triclinic                                                           | triclinic                                                                                      |
| Space group                         | P 2 <sub>1</sub> /n                                                 | P -1                                                                              | P 2 <sub>1</sub> /c                                                               | P 2 <sub>1</sub>                                                                  | P -1                                                                | P -1                                                                                           |
| Temperature (K)                     | 100(2)                                                              | 170(2)                                                                            | 100(2)                                                                            | 170(2)                                                                            | 170(2)                                                              | 100(2)                                                                                         |
| a (Å)                               | 3.8735(5)                                                           | 4.2914(3)                                                                         | 16.653(9)                                                                         | 3.7206(2)                                                                         | 6.9658(4)                                                           | 5.0520(7)                                                                                      |
| b (Å)                               | 15.890(2)                                                           | 10.398(7)                                                                         | 13.014(6)                                                                         | 18.347(9)                                                                         | 8.0624(5)                                                           | 13.194(17)                                                                                     |
| c (Å)                               | 21.215(3)                                                           | 16.176(10)                                                                        | 7.116(4)                                                                          | 10.137(5)                                                                         | 14.632(9)                                                           | 13.292(17)                                                                                     |
| α (deg)                             | 90                                                                  | 81.924(4)                                                                         | 90                                                                                | 90                                                                                | 75.678(4)                                                           | 112.280(5)                                                                                     |
| β (deg)                             | 92.664(6)                                                           | 89.829(4)                                                                         | 101.118(3)                                                                        | 98.126(3)                                                                         | 81.535(4)                                                           | 97.693(5)                                                                                      |
| γ (deg)                             | 90                                                                  | 85.327(4)                                                                         | 90                                                                                | 90                                                                                | 88.527(4)                                                           | 92.622(5)                                                                                      |
| Cell volume (Å <sup>3</sup> )       | 1304.4(3)                                                           | 712.28(8)                                                                         | 1513.25(14)                                                                       | 685.02(6)                                                                         | 787.50(8)                                                           | 807.95(19)                                                                                     |
| Calc. density (g cm <sup>-3</sup> ) | 1.539                                                               | 1.475                                                                             | 1.441                                                                             | 1.509                                                                             | 1.643                                                               | 1.469                                                                                          |
| Z                                   | 4                                                                   | 2                                                                                 | 4                                                                                 | 2                                                                                 | 2                                                                   | 2                                                                                              |
| R <sub>int</sub>                    | 0.0691                                                              | 0.0368                                                                            | 0.0420                                                                            | 0.0296                                                                            | 0.0442                                                              | 0.0388                                                                                         |
| R <sub>1</sub> (I > 2σ(I))          | 0.0679                                                              | 0.0475                                                                            | 0.05                                                                              | 0.0595                                                                            | 0.0531                                                              | 0.0568                                                                                         |
| wR <sub>2</sub>                     | 0.2248                                                              | 0.1594                                                                            | 0.1243                                                                            | 0.1987                                                                            | 0.1444                                                              | 0.2006                                                                                         |
| Goof (S)                            | 0.965                                                               | 1.086                                                                             | 1.065                                                                             | 1.039                                                                             | 1.127                                                               | 1.074                                                                                          |
| CCDC                                | 1522575                                                             | 1522576                                                                           | 1522577                                                                           | 1522578                                                                           | 1522579                                                             | 1522580                                                                                        |



**Table S4.** List of intermolecular H-bonding lengths and angles for five different solid forms

| Crystal form | Interactions | H...A/<br>Å | D...A/Å    | <D-H...A/° | Symmetry code      |
|--------------|--------------|-------------|------------|------------|--------------------|
| S1           | O3-H1...O1   | 2.58        | 3.064(4)   | 119        | 1-x,1-y,1-z        |
|              | O4-H2...O6   | 1.75        | 2.552(6)   | 164        | 1+x,y,z            |
|              | O6-H4...O5   | 2.56        | 3.233(6)   | 141        | 1/2+x,1/2-y,-1/2+z |
|              | C15-H11...O2 | 2.53        | 3.455(5)   | 163        | -x,-y,1-z          |
|              | C16-H12...O6 | 2.43        | 3.317(9)   | 154        | 1+x,y,z            |
| S2           | O4-H2...O6   | 1.79(3)     | 2.655(2)   | 169(2)     | -x,1-y,1-z         |
|              | O6-H4...O3   | 2.11        | 2.922(2)   | 171        | 1+x,y,z            |
|              | C2-H5...O3   | 2.54        | 3.362(2)   | 147        | -x,1-y,1-z         |
|              | C15-H9...O2  | 2.46        | 3.380(3)   | 161        | 1-x,2-y,-z         |
| S3           | O4-H4...O6   | 1.85        | 2.6686(19) | 178        | x,-1+y,z           |
|              | C2-H8...O4   | 2.56        | 3.418(2)   | 154        | -x,-y,-z           |
|              | C4-H10...O6  | 2.53        | 3.211(2)   | 130        | x,-1+y,z           |
|              | C7-H12...O2  | 2.59        | 3.455(2)   | 154        | 1-x,1/2+y,3/2-z    |
| S4           | O4-H2...N1   | 2.04        | 2.776(9)   | 148        | 1-x,1/2+y,1-z      |
|              | C17-H11...O2 | 2.46        | 3.227(8)   | 136        | 1+x,y,1+z          |
| S5           | O3-H1...O5   | 2.44(4)     | 2.980(3)   | 121(3)     | 2-x,-y,-z          |
|              | O4-H2...O2   | 2.02(4)     | 2.802(3)   | 174(5)     | -x,1-y,-z          |
|              | O5-H3...O1   | 2.43(4)     | 2.933(3)   | 118(3)     | 2-x,-y,-z          |
|              | C4-H5...O2   | 2.54        | 3.242(4)   | 132        | -x,1-y,-z          |
|              | C16-H11...O3 | 2.39        | 3.091(4)   | 128        | 1-x,1-y,-z         |
|              | C16-H11...O4 | 2.52        | 3.173(4)   | 124        | -x,1-y,-z          |
| S6           | O3-H1...O5   | 2.55(4)     | 3.203(3)   | 133(3)     | 1-x,-y,-z          |
|              | O4-H2...O6   | 1.77(4)     | 2.671(3)   | 173(4)     | 2-x,1-y,1-z        |
|              | O5-H3...O1   | 2.41        | 2.876(3)   | 117        | 1-x,-y,-z          |

|  |               |      |          |     |             |
|--|---------------|------|----------|-----|-------------|
|  | C2-H4...O4    | 2.49 | 3.393(4) | 163 | 3-x,-y,1-z  |
|  | C15-H10...O2  | 2.53 | 3.373(3) | 147 | 1-x,1-y,1-z |
|  | C18-H15...O6  | 2.46 | 3.287(7) | 143 | -1+x,y,z    |
|  | C16-H16B...O3 | 2.42 | 3.371(6) | 165 | x,1+y,z     |
|  | C19-H17...O2  | 2.39 | 3.328(6) | 163 | 1-x,1-y,1-z |
|  | C17-H17B...O5 | 2.49 | 3.266(9) | 137 | 1-x,1-y,-z  |

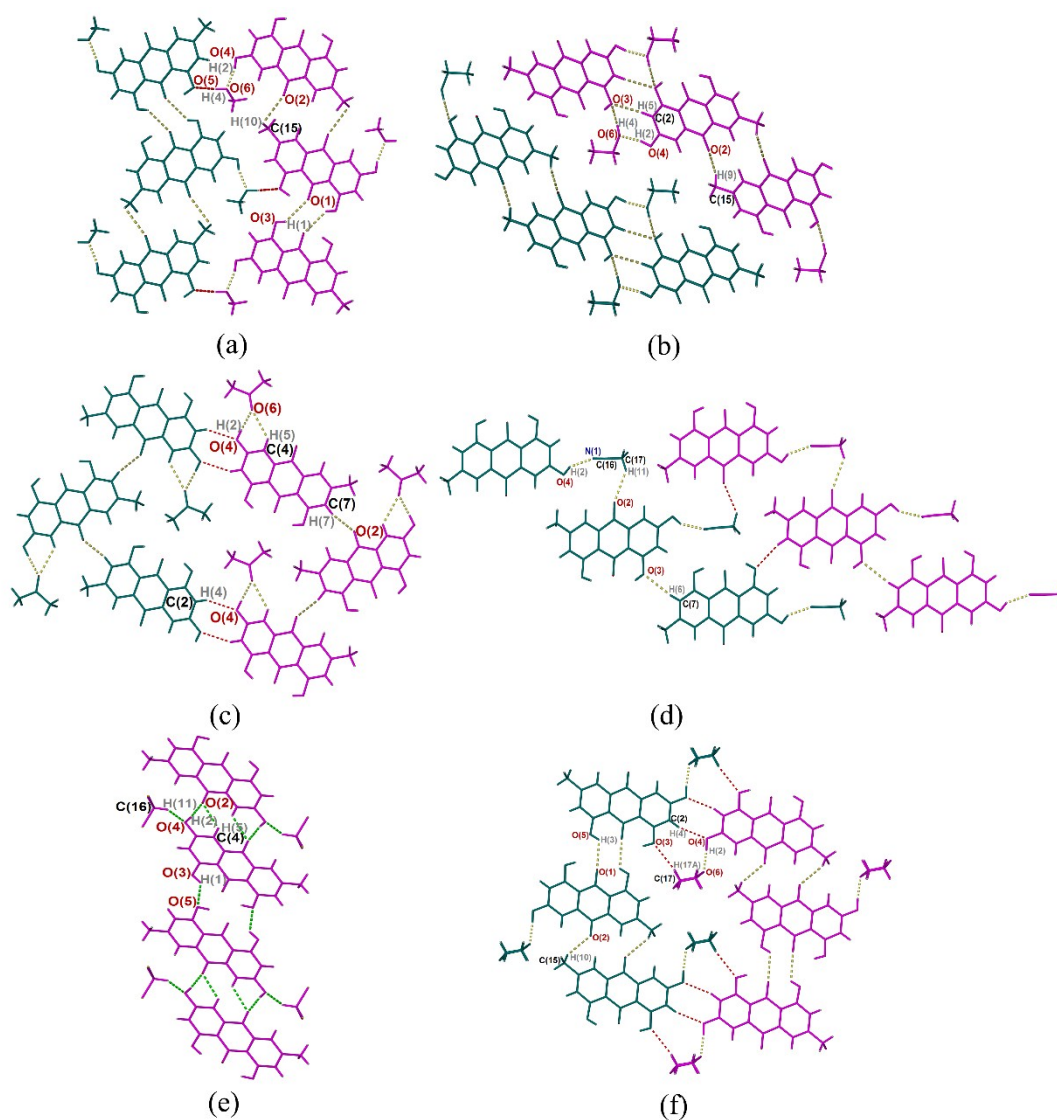

**Figure S9.** Single crystal H-bonding patterns of EM solvates (a) S1 [a-axis], (b) S2 [a-axis], (c) S3 [c-axis], (d) S4 [a-axis], (e) S5 [b-axis], (f) S6 [a-axis]
